# Supplementary material for: Removal of inhibition uncovers latent movement potential during preparation
Source: eLife journal article supplement (doi:10.7554/elife.29648), 2017-09-11
Supplement: supp [file elife-29648-supp-v1.zip]

Archive with 4 entries (4 files):
- elife_poa_e29648_Figure_5_figure_supplement_2.jpg
- elife_poa_e29648_Transparent_Reporting_File.pdf
- elife_poa_e29648_Figure_5_figure_supplement_1.jpg
- elife_poa_e29648_Figure_4_figure_supplement_1.jpg
