# Supplementary figures and images for: Removal of inhibition uncovers latent movement potential during preparation
Source: eLife journal article supplement (doi:10.7554/elife.29648), 2017-09-11

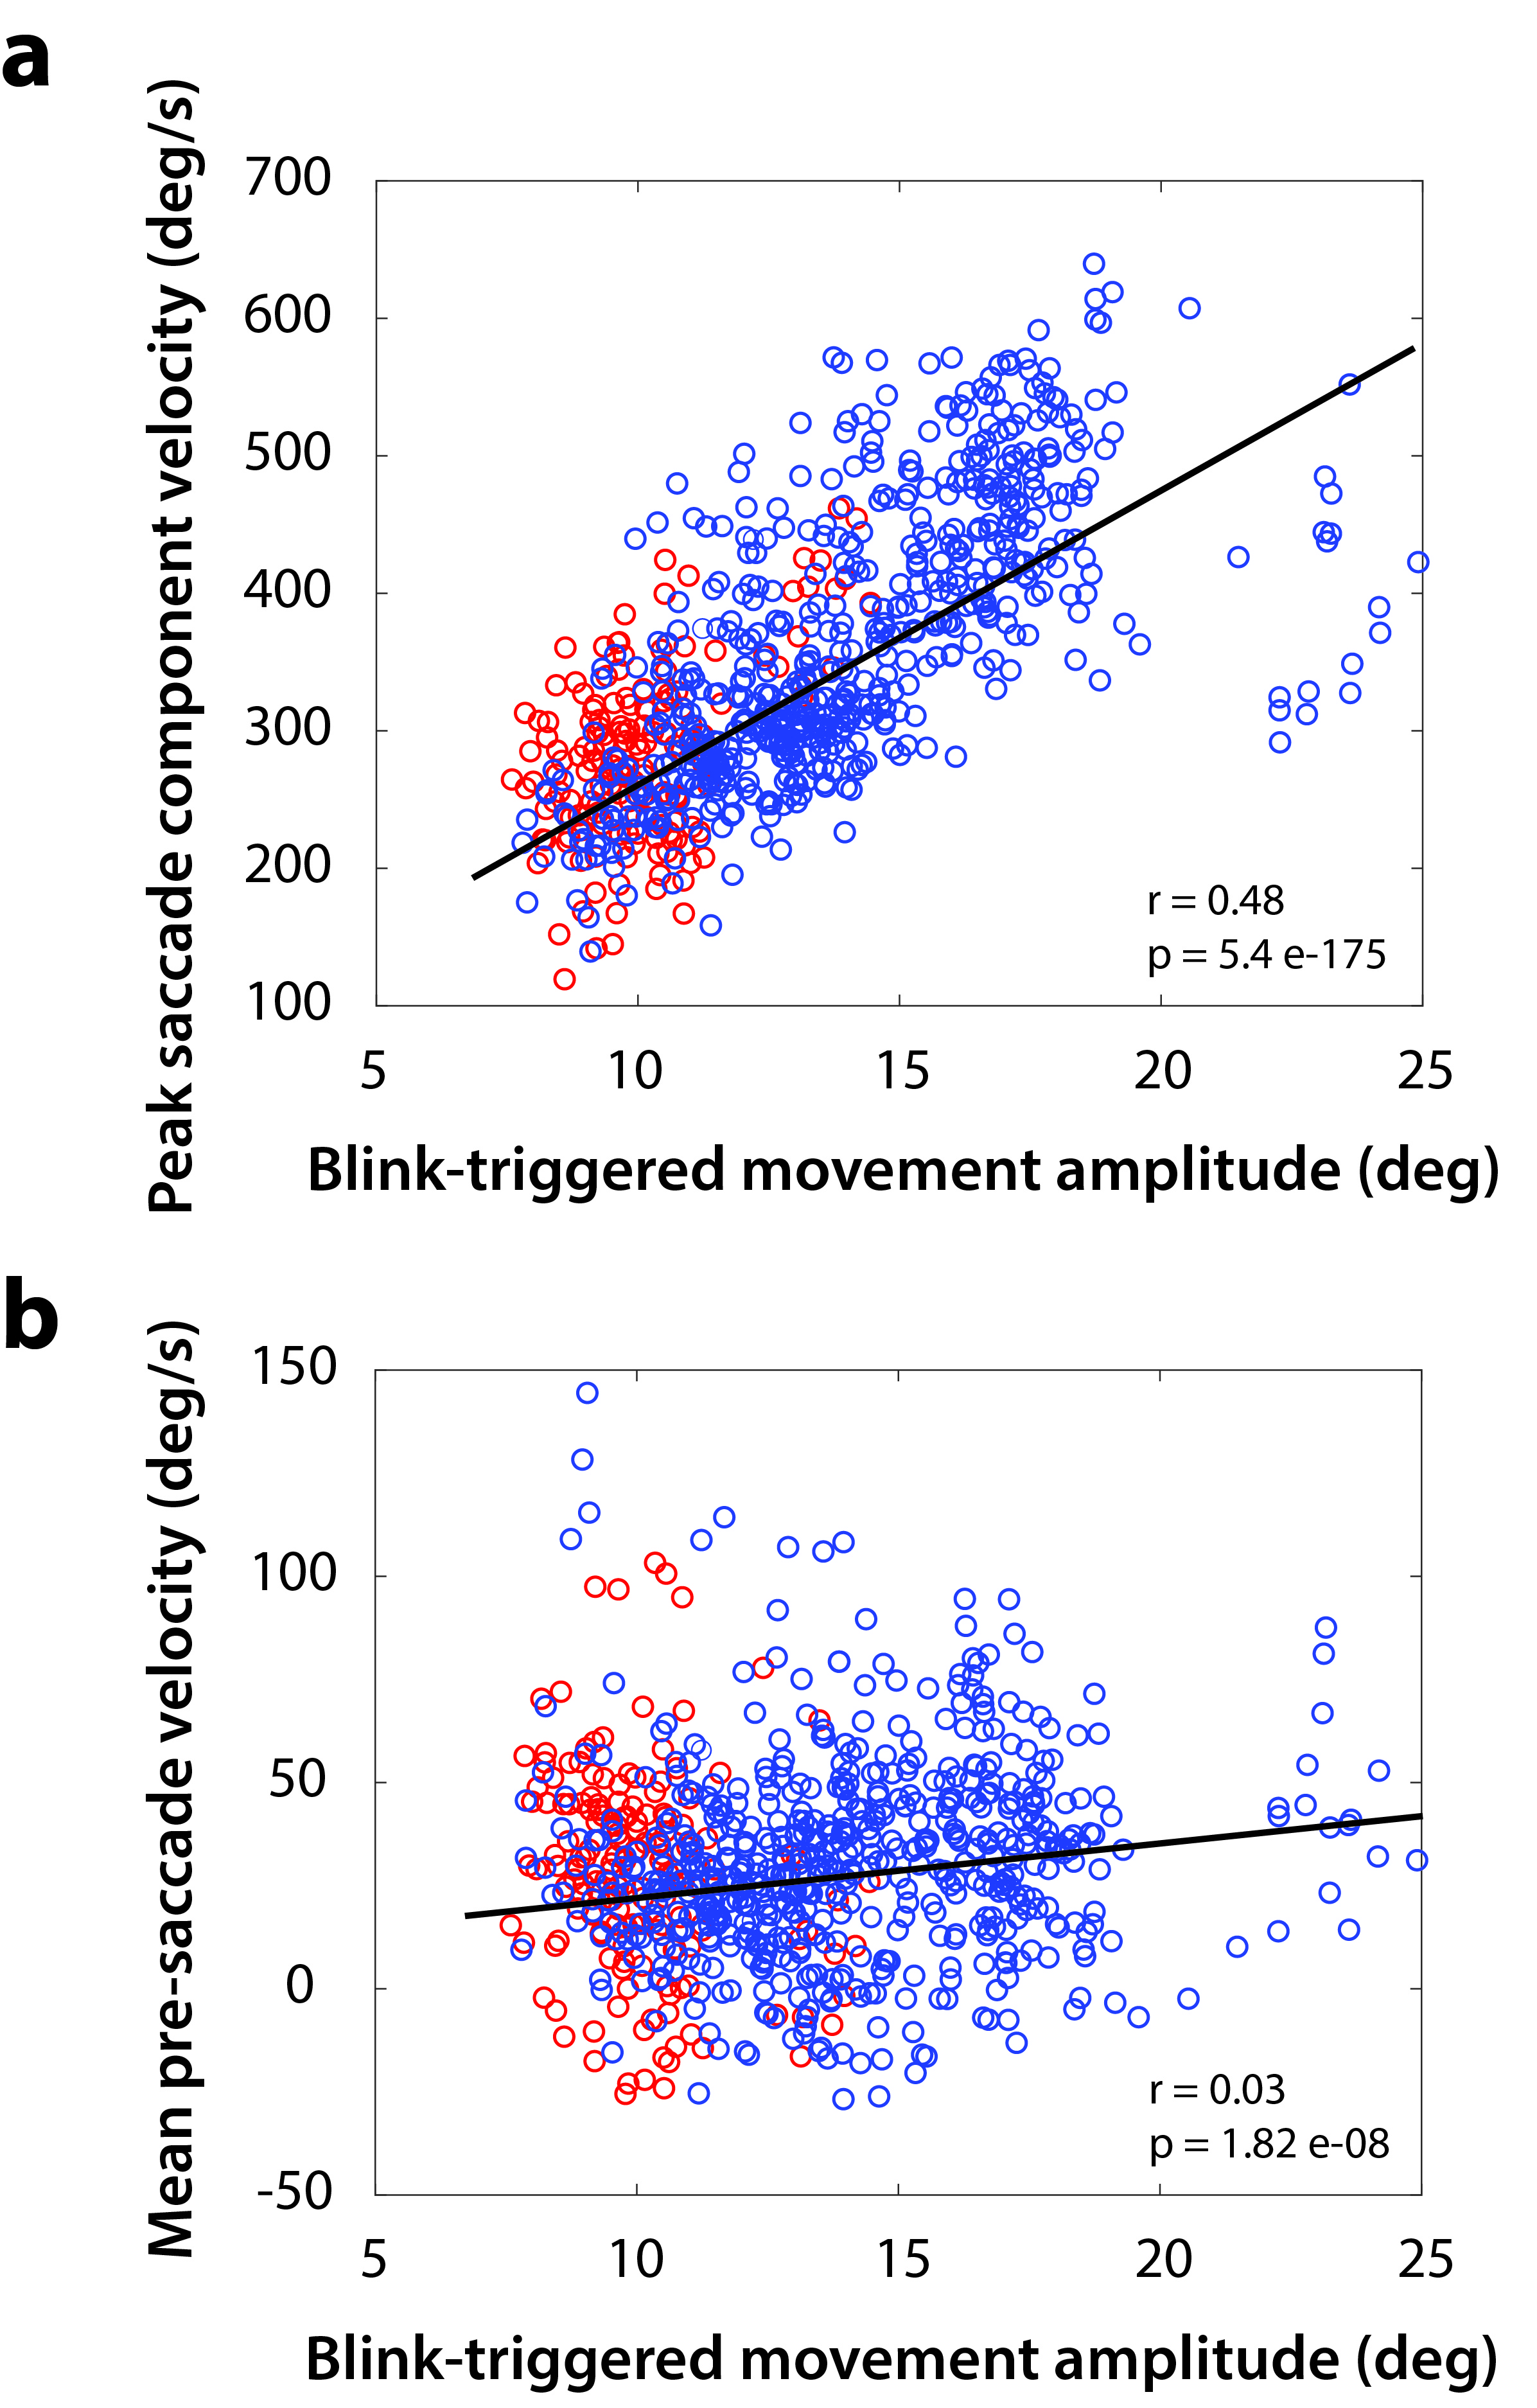

Supplement: supp [file elife-29648-supp-v1.zip › elife_poa_e29648_Figure_5_figure_supplement_2.jpg]
